# Supplementary material
Source: PubMed Central journal article supplement (PMC3360814)
Supplement: NIHMS375950-supplement-1_si_001.pdf [file NIHMS375950-supplement-1_si_001.pdf]

*Supporting Information*

*for*

**Direct Formation of the C5'-Radical in the Sugar-Phosphate  
Backbone of DNA by High Energy Radiation**

by

Amitava Adhikary, David Becker, Brian J. Palmer, Alicia N. Heizer, and Michael D. Sevilla\*

Department of Chemistry  
Oakland University  
Rochester, MI 48309

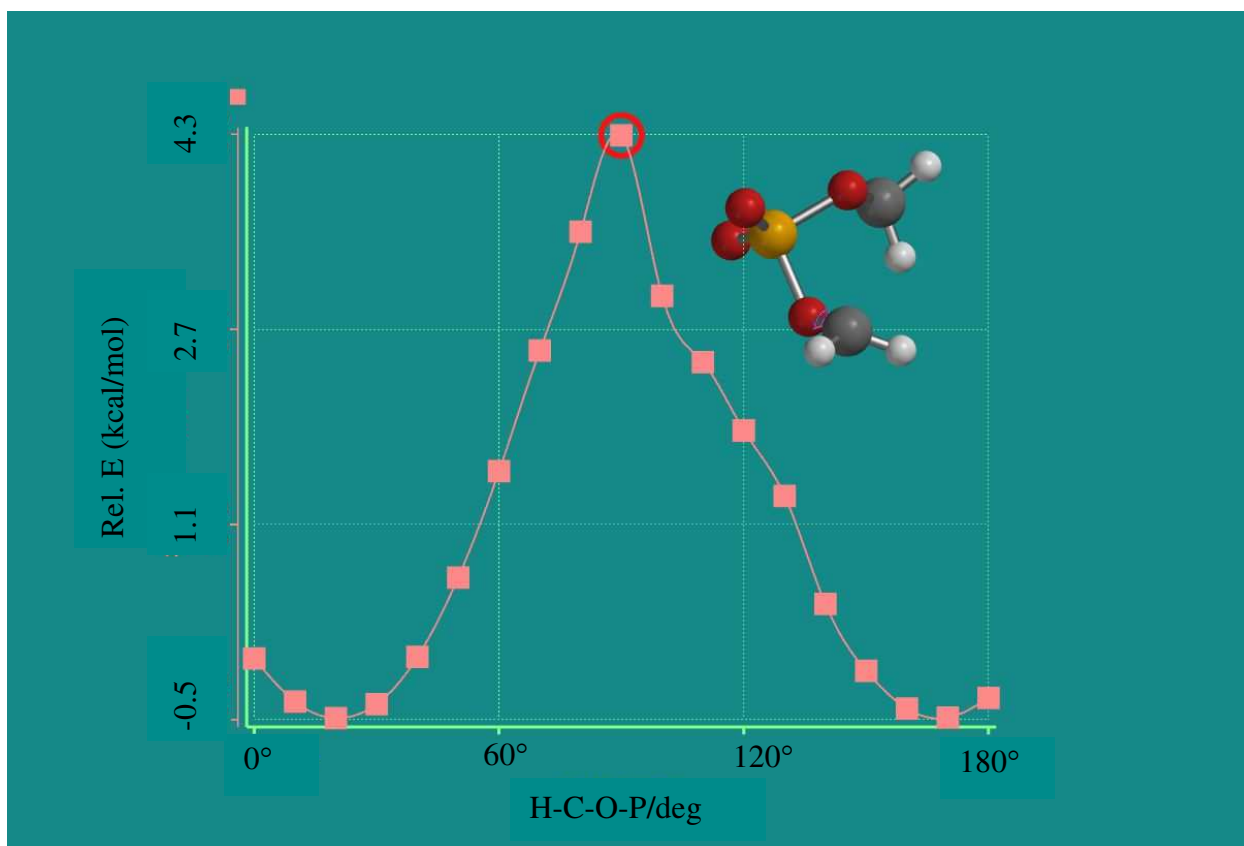

**Figure S1.** The optimized geometry of the highest energy conformation of  $\text{CH}_3\text{OP}(\text{O}_2^-)\text{OCH}_2\bullet$  in the gas phase obtained by employing DFT/B3LYP/6-31G(d) method. The potential energy surface of various conformations of  $\text{CH}_3\text{OP}(\text{O}_2^-)\text{OCH}_2\bullet$  was obtained by stepwise (each step =  $10^\circ$ ) gradual increase of the dihedral angle H-C-O-P from  $0^\circ$  to  $180^\circ$  in 18 steps.

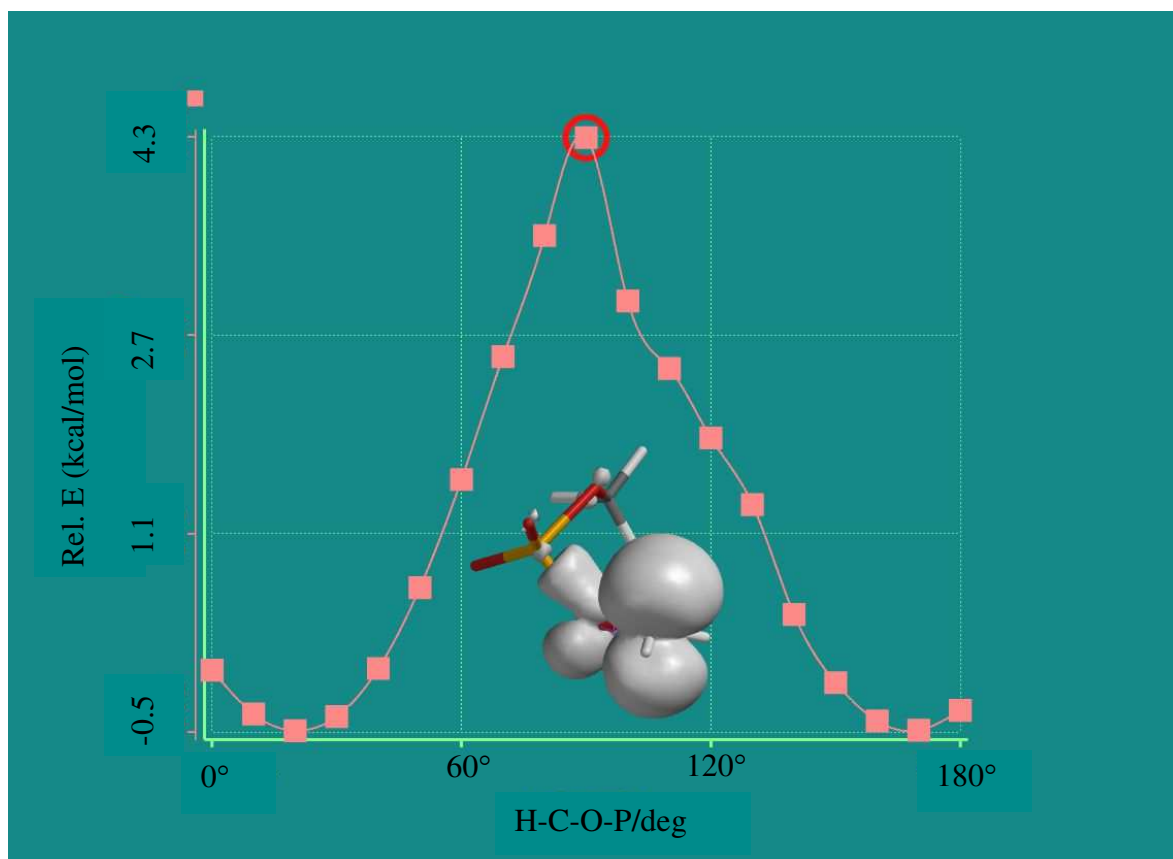

**Figure S2.** The spin density distributions in the optimized geometry of the highest energy conformation of  $\text{CH}_3\text{OP}(\text{O}_2^-)\text{OCH}_2\bullet$  in the gas phase obtained by employing DFT/B3LYP/6-31G(d) method. The potential energy surface of various conformations of  $\text{CH}_3\text{OP}(\text{O}_2^-)\text{OCH}_2\bullet$  was obtained by stepwise (each step =  $10^\circ$ ) gradual increase of the dihedral angle H-C-O-P from  $0^\circ$  to  $180^\circ$  in 18 steps. A 40 G beta phosphorous coupling is found at the maximum in energy.

**The complete reference 36(b):**

Frisch, M. J.; Trucks, G. W.; Schlegel, H. B.; Scuseria, G. E.;  
Robb, M. A.; Cheeseman, J. R.; Scalmani, G.; Barone, V.; Mennucci, B.;  
Petersson, G. A.; Nakatsuji, H.; Caricato, M.; Li, X.; Hratchian, H. P.;  
Izmaylov, A. F.; Bloino, J.; Zheng, G.; Sonnenberg, J. L.; Hada, M.;  
Ehara, M.; Toyota, K.; Fukuda, R.; Hasegawa, J.; Ishida, M.; Nakajima,  
T.; Honda, Y.; Kitao, O.; Nakai, H.; Vreven, T.; Montgomery, J. A. Jr.;  
Peralta, J. E.; Ogliaro, F.; Bearpark, M.; Heyd, J. J.; Brothers, E.; Kudin,  
K. N.; Staroverov, V. N.; Kobayashi, R.; Normand, J.; Raghavachari, K.;  
Rendell, A.; Burant, J. C.; Iyengar, S. S.; Tomasi, J.; Cossi, M.; Rega, N.;  
Millam, J. M.; Klene, M.; Knox, J. E.; Cross, J. B.; Bakken, V.; Adamo, C.;  
Jaramillo, J.; Gomperts, R.; Stratmann, R. E.; Yazyev, O.; Austin, A. J.;  
Cammi, R.; Pomelli, C.; Ochterski, J. W.; Martin, R. L.; Morokuma, K.;  
Zakrzewski, V. G.; Voth, G. A.; Salvador, P.; Dannenberg, J. J.; Dapprich,  
S.; Daniels, A. D.; Farkas, O.; Foresman, J. B.; Ortiz, J. V.; Cioslowski, J.;  
Fox, D. J. Gaussian 09; Gaussian, Inc.: Wallingford CT, 2009.
